# Supplementary material for: Using the Multiple Analysis Approach to Reconstruct Phylogenetic Relationships among Planktonic Foraminifera from Highly Divergent and Length-polymorphic SSU rDNA Sequences
Source: PubMed Central journal article supplement (PMC2808177; doi:10.4137/bbi.s3334), 2009-11-11
Supplement: Additional_File_3.pdf [file Additional_File_3.pdf]

| Taxonomic unit/ phylogenetic relationship                                | Nonparametric bootstrap support under ML |        |       |         |     |        | Nonparametric bootstrap support under MP |        |       |         |     |        |
|--------------------------------------------------------------------------|------------------------------------------|--------|-------|---------|-----|--------|------------------------------------------|--------|-------|---------|-----|--------|
|                                                                          | ClustalW                                 | KALIGN | MAFFT | NRALIGN | POA | POAGLO | ClustalW                                 | KALIGN | MAFFT | NRALIGN | POA | POAGLO |
| Split between microperforate and others                                  | 100                                      | 99     | 99    | 97      | 59  | 82     | 100                                      | 100    | 100   | 97      | 52  | 67     |
| <i>G. glutinata</i>                                                      | 100                                      | 19     | 91    | 98      | 95  | 97     | 100                                      | 100    | 100   | 100     | 100 | 100    |
| <i>G. uvula</i>                                                          | 100                                      | 100    | 100   | 96      | 60  | 89     | 100                                      | 100    | 96    | 94      | 26  | 59     |
| Split between macroperforate nonspinose and others                       | 70                                       | 10     | 30    | 72      | 82  | 54     | 1                                        | 0      | 16    | 8       | 20  | 16     |
| Genus <i>Globorotalia</i>                                                | --- Not recognized as clade ---          |        |       |         |     |        |                                          |        |       |         |     |        |
| <i>G. hirsuta</i>                                                        | 98                                       | 99     | 99    | 97      | 99  | 94     | 100                                      | 100    | 100   | 100     | 100 | 100    |
| <i>G. inflata</i> <sup>a</sup>                                           | 99                                       | 98     | 100   | 100     | 100 | 94     | 100                                      | 100    | 100   | 100     | 100 | 100    |
| <i>G. menardii</i>                                                       | 100                                      | 100    | 100   | 100     | 100 | 100    | 100                                      | 100    | 100   | 100     | 100 | 100    |
| <i>Globorotalia</i> ?sp.                                                 | 100                                      | 100    | 100   | 100     | 100 | 100    | 100                                      | 100    | 100   | 100     | 100 | 100    |
| <i>G. truncatulinoides</i>                                               | 100                                      | 100    | 100   | 100     | 100 | 100    | 100                                      | 99     | 100   | 100     | 100 | 100    |
| Genus <i>Neogloboquadrina</i> <sup>b</sup>                               | 7                                        | 5      | 33    | 5       | 39  | 35     | 0                                        | 0      | 1     | 1       | 2   | 7      |
| <i>N. dutertrei</i> + <i>Pulleniatina obliquiloculata</i>                | 0                                        | 43     | 35    | 0       | 66  | 91     | 0                                        | 71     | 64    | 12      | 99  | 98     |
| <i>N. dutertrei</i>                                                      | 100                                      | 100    | 94    | 100     | 100 | 100    | 100                                      | 100    | 100   | 100     | 100 | 100    |
| <i>P. obliquiloculata</i>                                                | 100                                      | 100    | 99    | 98      | 86  | 99     | 100                                      | 100    | 100   | 100     | 100 | 100    |
| Former <i>N. pachyderma</i>                                              | 5                                        | 7      | 17    | 30      | 22  | 28     | 3                                        | 0      | 1     | 14      | 4   | 4      |
| <i>N. incompta</i>                                                       | 100                                      | 100    | 100   | 100     | 100 | 100    | 100                                      | 100    | 100   | 100     | 100 | 100    |
| <i>N. pachyderma</i>                                                     | 99                                       | 98     | 99    | 100     | 98  | 100    | 100                                      | 100    | 100   | 100     | 100 | 100    |
| Split between spinose and others                                         | 92                                       | 44     | 100   | 100     | 77  | 37     | 49                                       | 0      | 53    | 61      | 25  | 22     |
| <i>Hastigerina</i> types placed as sister clades                         | 4                                        | 0      | 38    | 9       | 88  | 68     | 4                                        | 2      | 13    | 6       | 24  | 31     |
| <i>Hastigerina</i> types placed as grade                                 | 5                                        | 0      | 16    | 52      | 0   | 8      | 21                                       | 1      | 17    | 18      | 0   | 1      |
| <i>H. pelagica</i> , known type                                          | 100                                      | 100    | 100   | 100     | 100 | 100    | 100                                      | 100    | 100   | 100     | 100 | 100    |
| New <i>H. pelagica</i> type                                              | 100                                      | 100    | 100   | 100     | 100 | 100    | 100                                      | 100    | 100   | 100     | 100 | 100    |
| All other spinose forming a clade                                        | 51                                       | 5      | 64    | 51      | 24  | 20     | 29                                       | 0      | 29    | 7       | 16  | 4      |
| <i>Globigerinella</i> sister to <i>Globigerinoides</i> + <i>Orbulina</i> | 3                                        | 69     | 86    | 53      | 67  | 56     | 3                                        | 5      | 26    | 18      | 26  | 26     |
| <i>Globigerinella</i> sister to <i>Globigerina</i> + <i>Turborotalia</i> | 1                                        | 0      | 0     | 0       | 14  | 2      | 2                                        | 0      | 5     | 1       | 20  | 2      |
| <i>Globigerinella</i> sister to remaining spinose                        | 59                                       | 0      | 0     | 2       | 0   | 0      | 24                                       | 4      | 3     | 1       | 0   | 0      |
| <i>Globigerinella siphonifera</i> clade                                  | 100                                      | 89     | 100   | 99      | 100 | 100    | 100                                      | 12     | 100   | 100     | 100 | 100    |
| <i>G. siphonifera</i> type I                                             | 100                                      | 99     | 100   | 100     | 100 | 100    | 100                                      | 100    | 100   | 99      | 100 | 100    |
| <i>G. siphonifera</i> type I sister to types II+III and IV               | 0                                        | 72     | 95    | 99      | 13  | 89     | 88                                       | 0      | 94    | 98      | 21  | 51     |
| Clade with <i>G. siphonifera</i> types II and III                        | 0                                        | 48     | 98    | 98      | 40  | 0      | 85                                       | 0      | 98    | 99      | 78  | 69     |
| <i>G. siphonifera</i> type II <sup>c</sup>                               | 0                                        | 26     | 79    | 95      | 30  | 0      | 38                                       | 0      | 32    | 81      | 34  | 27     |
| <i>G. siphonifera</i> type III                                           | 95                                       | 93     | 84    | 97      | 85  | 84     | 85                                       | 92     | 68    | 79      | 94  | 95     |
| <i>G. siphonifera</i> type IV                                            | 100                                      | 99     | 100   | 100     | 100 | 99     | 100                                      | 100    | 100   | 100     | 100 | 100    |
| <i>Globigerinoides</i> - <i>Orbulina</i> clade                           | 100                                      | 79     | 34    | 32      | 92  | 60     | 66                                       | 28     | 17    | 12      | 63  | 40     |
| Genus <i>Globigerinoides</i>                                             | 0                                        | 100    | 6     | 0       | 3   | 0      | 0                                        | 100    | 6     | 6       | 24  | 0      |
| <i>G. ruber</i> - <i>conglobatus</i> clade                               | 100                                      | 99     | 100   | 100     | 100 | 100    | 100                                      | 100    | 100   | 100     | 100 | 100    |
| <i>G. ruber</i> s.str.                                                   | 100                                      | 100    | 100   | 100     | 100 | 100    | 100                                      | 100    | 100   | 100     | 100 | 100    |
| <i>G. conglobatus</i> s.l.                                               | 99                                       | 97     | 95    | 94      | 90  | 82     | 100                                      | 100    | 100   | 90      | 99  | 99     |
| <i>G. sacculifer</i>                                                     | 100                                      | 100    | 100   | 100     | 100 | 100    | 100                                      | 100    | 100   | 100     | 100 | 100    |
| <i>G. sacculifer</i> - <i>Orbulina</i> clade                             | 100                                      | 0      | 83    | 98      | 95  | 100    | 99                                       | 0      | 64    | 86      | 64  | 99     |
| <i>Orbulina</i> clade                                                    | 100                                      | 100    | 100   | 94      | 86  | 85     | 99                                       | 100    | 100   | 86      | 91  | 93     |
| <i>Globigerina</i> - <i>Turborotalita</i> clade                          | 44                                       | 12     | 79    | 51      | 65  | 35     | 13                                       | 9      | 18    | 37      | 57  | 22     |
| <i>Globigerina</i> monophyletic                                          | 94                                       | 90     | 77    | 80      | 56  | 88     | 100                                      | 100    | 85    | 53      | 53  | 68     |
| <i>G. bulloides</i>                                                      | 93                                       | 99     | 100   | 98      | 100 | 100    | 100                                      | 100    | 100   | 100     | 100 | 100    |
| <i>G. falconensis</i>                                                    | 100                                      | 100    | 100   | 100     | 100 | 100    | 100                                      | 100    | 100   | 100     | 100 | 100    |
| <i>Turborotalia quinqueloba</i>                                          | 100                                      | 100    | 100   | 93      | 100 | 100    | 100                                      | 100    | 100   | 99      | 100 | 100    |

<sup>a</sup> Including the accession labelled as *Globorotalia crassaformis*

<sup>b</sup> Including *P. obliquiloculata*

<sup>c</sup> Including the accession labelled as *Globigerinella calida*

|   |                                                               |
|---|---------------------------------------------------------------|
| ■ | Well-supported by nonparametric bootstrapping under ML and MF |
| ■ | Moderately to well-supported                                  |
| ■ | Not unambiguously supported                                   |
| ■ | Not supported                                                 |
| ■ | Differently supported under ML and MF                         |
